# Supplementary material
Source: PubMed Central journal article supplement (PMC556294)

N-PINK1-GFP

PINK1-C-GFP

KD

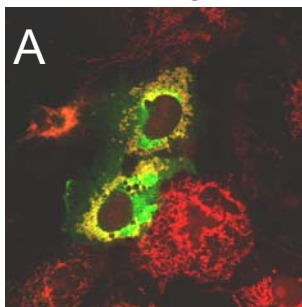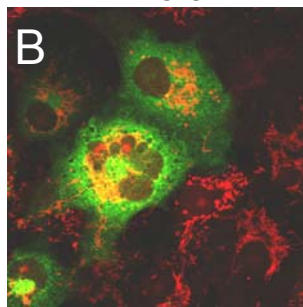

L347P

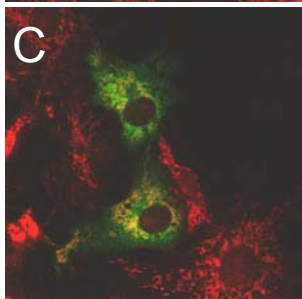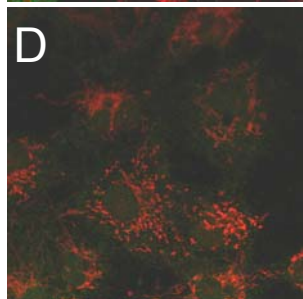

G309D

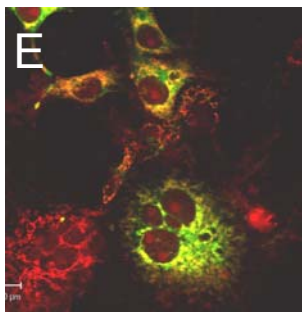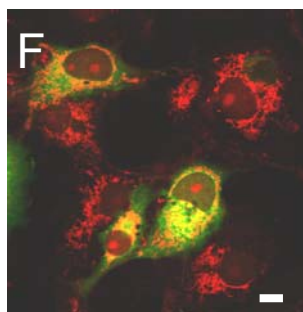

Supplement: pnas_102_16_5703__1.pdf [file pnas_102_16_5703__1.pdf]
